## Regulation of RIC-3 and of nAChR expression

Yael Ben-David and Millet Treinin

The nicotinic acetylcholine receptors (nAChRs) form a large and diverse family of pentameric acetylcholine-gated ion channels which are expressed widely and have diverse roles. The best known nAChR,  $\alpha 1\beta 1\delta\epsilon$  or  $\alpha 1\beta 1\delta\gamma$ , is expressed in skeletal muscle and mediates muscle excitation by motor neurons. In neurons nAChRs have both excitatory and modulatory roles and in non-excitatory cells they affect many processes including suppression of pro-inflammatory cytokine release from immune cells [1]. Moreover, CNS-expressed nAChRs have been implicated in several neurodegenerative diseases including Parkinson's disease, dementia with Lewy bodies, and Alzheimer's disease [2, 3].

Maturation of nAChRs is a complex and inefficient process requiring assistance from multiple cellular factors including RIC-3, a conserved endoplasmic reticulum-resident protein and nAChR-specific chaperone. RIC-3 was first identified in the nematode *Caenorhabditis elegans* as a positive effector of nAChR maturation. Effects of mammalian RIC-3, however, were shown to be either positive or negative depending on the receptor and the experimental system [1]. The versatile effects of RIC-3 on co-expressed nAChRs and the diverse roles of nAChRs affected by it suggest that mechanisms regulating RIC-3's function enable regulation of multiple processes involving nAChRs. One mechanism likely to affect RIC-3 function is alternative splicing, as expression studies identified multiple alternatively spliced RIC-3 isoforms differentially expressed in multiple tissues [4].

To better understand effects of RIC-3 splicing on nAChR maturation we analyzed two conserved RIC-3 isoforms: one encoding for the full-length (FL) RIC-3 having two transmembrane domains followed by a coiled-coil domain, and the other encoding for the transmembrane domains only (TM). These two RIC-3 isoforms were examined for their effects on three major neuronal nAChRs ( $\alpha 3\beta 4$ ,  $\alpha 4\beta 2$  and  $\alpha 7$ ) using electrophysiological analysis in *Xenopus laevis* oocytes. This analysis showed that the TM isoform lacking the coiled-coil domain is defective for either positive or negative effects of RIC-3 depending on the specific nAChR examined [5]. Specifically, FL amplified currents through  $\alpha 4\beta 2$  at low concentrations and inhibited currents at high concentrations; in contrast, FL inhibited currents through  $\alpha 7$  at low or very high concentrations and amplified currents at a high concentration. TM did not amplify currents through  $\alpha 7$

nAChR and did not inhibit currents through  $\alpha 4\beta 2$  nAChR at any concentration. FL and TM similarly amplified currents through  $\alpha 3\beta 4$  at low concentrations and inhibited currents at high concentrations [5]. Together these results are consistent with previous results suggesting that RIC-3 interacts differently with different nAChRs [6].

Results from expression analysis show that the two RIC-3 isoforms express in the brain differentially and in immune cells RIC-3 expression and splicing are regulated by inflammatory signals. This regulation of RIC-3 expression and splicing is likely to have functional implications as electrophysiology results, summarized above, show either positive or negative effects of RIC-3 on nAChR expression, depending on RIC-3 expression level, specific RIC-3 isoform, and specific nAChR [5].

Of special interest are effects of RIC-3 expression and splicing on the  $\alpha 7$  nAChR. Effects of RIC-3 on this receptor are strongly dependent on RIC-3-to-receptor ratio and on the RIC-3 isoform [5]. The  $\alpha 7$  nAChR is widely expressed, has many functions, and has been implicated in several neurodegenerative diseases [2, 7]. Among other functions,  $\alpha 7$  nAChR mediates the cholinergic anti-inflammatory pathway in immune cells - a pathway enabling suppression of inflammation by the vagus nerve. Our results showing regulation of RIC-3 expression and splicing by inflammatory signals in immune cells suggest, therefore, that regulation of RIC-3 expression and splicing affect  $\alpha 7$  nAChR functional expression and thereby inflammatory processes. Indeed, RIC-3 and the  $\alpha 7$  nAChR have been implicated in neurodegenerative diseases in which neuroinflammation is known or is likely to have a role [7,8]. Future studies, therefore, should examine the role of RIC-3 and of mechanisms regulating its expression and splicing in neuroinflammatory diseases.

**Millet Treinin:** Department of Medical Neurobiology, Hadassah Medical School-Hebrew University, Jerusalem, Israel

**Correspondence to:** Millet Treinin, email millet.treinin@mail.huji.ac.il

**Keywords:** RIC-3, nicotinic acetylcholine receptors, alternative splicing, cholinergic anti-inflammatory pathway, Neuroscience

**Received:** November 23, 2016

**Published:** December 12, 2016

## REFERENCES

1. Treinin M. *Biotechnol J.* 2008; 3: 1539-47.
2. Schaaf CP. *Genet Med.* 2014; 16: 649-56.
3. Dani JA, et al. *Annu Rev Pharmacol Toxicol.* 2007; 47: 699-729.
4. Halevi S, et al. *J Biol Chem.* 2003; 278: 34411-7.
5. Ben-David Y, et al. *Mol Brain.* 2016; 9: 47.
6. Cohen Ben-Ami H, et al. *Biochemistry.* 2009; 48: 12329-36.
7. Treinin M, et al. *Cent Nerv Syst Agents Med Chem.* 2016.
8. Sudhaman S, et al. *J Med Genet.* 2016; 53: 559-66.
